# Supplementary material for: Traditional Chinese Medicine Strategy for Patients with Tourette Syndrome Based on Clinical Efficacy and Safety: A Meta‐Analysis of 47 Randomized Controlled Trials
Source: Hindawi journal article supplement (doi:10.1155/2021/6630598), 2021-01-01
Supplement: f2 [file 6630598.f2.pdf]

**Supplement Figure.1 Risk of Bias graph**

| Items |   |   |   |   |   |   | Author, year         |
|-------|---|---|---|---|---|---|----------------------|
| L     | U | U | U | L | U | U | Wenzhong Zhang, 2013 |
| L     | U | U | U | L | U | U | Weibin Gao, 2007     |
| L     | U | L | H | L | U | L | Dahua Wu, 2007       |
| L     | U | U | U | H | H | U | Guolan Ge, 2013      |
| L     | U | U | U | H | U | U | Linghua Deng, 2014   |
| L     | L | U | U | L | L | L | Congling Sun, 2008   |
| L     | U | U | U | L | U | L | Anyuan Li, 2008      |
| L     | U | U | U | L | U | L | Ruiping Ma, 2006     |
| L     | U | U | U | L | U | L | Anyuan Li, 2013      |
| L     | U | U | U | L | U | U | Riming Wu, 2004      |
| L     | U | U | U | L | U | U | Ying Tang, 2015      |
| L     | U | U | U | L | U | U | Hengping Chen, 2009  |
| L     | U | U | U | L | U | U | Guiping Li, 2013     |
| L     | U | U | U | L | U | U | Xiubo Du, 2011       |
| L     | U | U | U | L | U | U | Yan Liu, 2009        |
| L     | U | U | U | L | U | U | Bo wang, 2013        |
| L     | U | U | U | L | U | L | Lijun Deng, 2015     |
| L     | U | U | U | L | U | L | Feifei Chen, 2011    |
| L     | L | L | U | L | L | L | Tingting Fu, 2007    |
| L     | U | U | U | L | U | U | Feng Han, 2015       |
| L     | U | U | U | L | U | U | Huawei Li, 2011      |

|   |   |   |   |   |   |   |                    |
|---|---|---|---|---|---|---|--------------------|
| L | U | U | U | L | U | H | Rongyi Zhou, 2016  |
| L | U | U | U | L | U | L | Siyuan Hu, 2014    |
| L | U | U | U | L | U | H | Qi Sun, 2016       |
| L | U | U | U | H | U | U | Lifeng Shi, 2009   |
| L | L | L | H | L | L | L | Yi Zheng,2016      |
| L | U | L | H | L | L | L | Jinhui Li, 2016    |
| L | U | L | L | L | U | L | Xingyou Zhao, 2007 |
| L | U | L | H | L | L | L | Na Yang, 2016      |
| L | U | U | U | H | U | H | Rong Ma, 2010      |
| L | U | U | U | L | U | U | Zheng Hong, 2015   |
| L | U | U | U | L | U | L | Meiying Liu, 2011  |
| L | U | L | H | L | U | L | Jin Li, 2010       |
| L | U | U | U | L | U | U | Haiying Wei, 2013  |
| L | U | U | U | L | U | U | Di Zhang, 2013     |
| L | U | U | U | L | U | U | Chuang Zhao, 2014  |
| L | U | L | H | L | L | L | L Zhao,2010        |
| L | U | U | U | L | U | L | Anyuan Li, 2009    |
| L | U | U | U | L | U | L | Min Wu, 2010       |
| L | U | U | U | L | L | L | Min Wu, 2009       |
| L | U | U | U | L | U | U | Yunchou Wu,2015    |
| L | U | U | U | H | H | U | Feng Yang, 2012    |
| L | U | U | U | L | U | U | Fen Wang, 2011     |
| L | U | U | U | L | U | U | Xinhui Shan, 2016  |

|                                                              |   |   |   |   |   |   |   |                                                                                                                                                                                                                                                                                                                        |
|--------------------------------------------------------------|---|---|---|---|---|---|---|------------------------------------------------------------------------------------------------------------------------------------------------------------------------------------------------------------------------------------------------------------------------------------------------------------------------|
|                                                              | L | U | U | U | L | L | U | Jiaomei Feng, 2011                                                                                                                                                                                                                                                                                                     |
|                                                              | L | U | U | U | L | U | U | Jinping Fan, 2017                                                                                                                                                                                                                                                                                                      |
|                                                              | L | U | U | U | L | U | U | Jingyu Qiu, 2010                                                                                                                                                                                                                                                                                                       |
| Random sequence generation<br>(selection bias)               | L | U | U | U | L | L | U |                                                                                                                                                                                                                                                                                                                        |
| Allocation concealment<br>(selection bias)                   | L | U | U | U | L | L | U |                                                                                                                                                                                                                                                                                                                        |
| Blinding of participants and<br>personnel (performance bias) | L | U | U | U | L | L | U |                                                                                                                                                                                                                                                                                                                        |
| Blinding of outcome<br>assessment (detection bias)           | L | U | U | U | L | L | U |                                                                                                                                                                                                                                                                                                                        |
| Incomplete outcome data<br>(attrition bias)                  | L | U | U | U | L | L | U |                                                                                                                                                                                                                                                                                                                        |
| Selective reporting<br>(reporting bias)                      | L | U | U | U | L | L | U |                                                                                                                                                                                                                                                                                                                        |
| Other bias                                                   | L | U | U | U | L | L | U |                                                                                                                                                                                                                                                                                                                        |
|                                                              |   |   |   |   |   |   |   |  <b>Low risk</b><br> <b>Unclear risk</b><br> <b>High risk</b> |
