# Supplementary material for: Traditional Chinese Medicine Strategy for Patients with Tourette Syndrome Based on Clinical Efficacy and Safety: A Meta‐Analysis of 47 Randomized Controlled Trials
Source: Hindawi journal article supplement (doi:10.1155/2021/6630598), 2021-01-01

Supplement Figure.2 Risk of Bias Summary

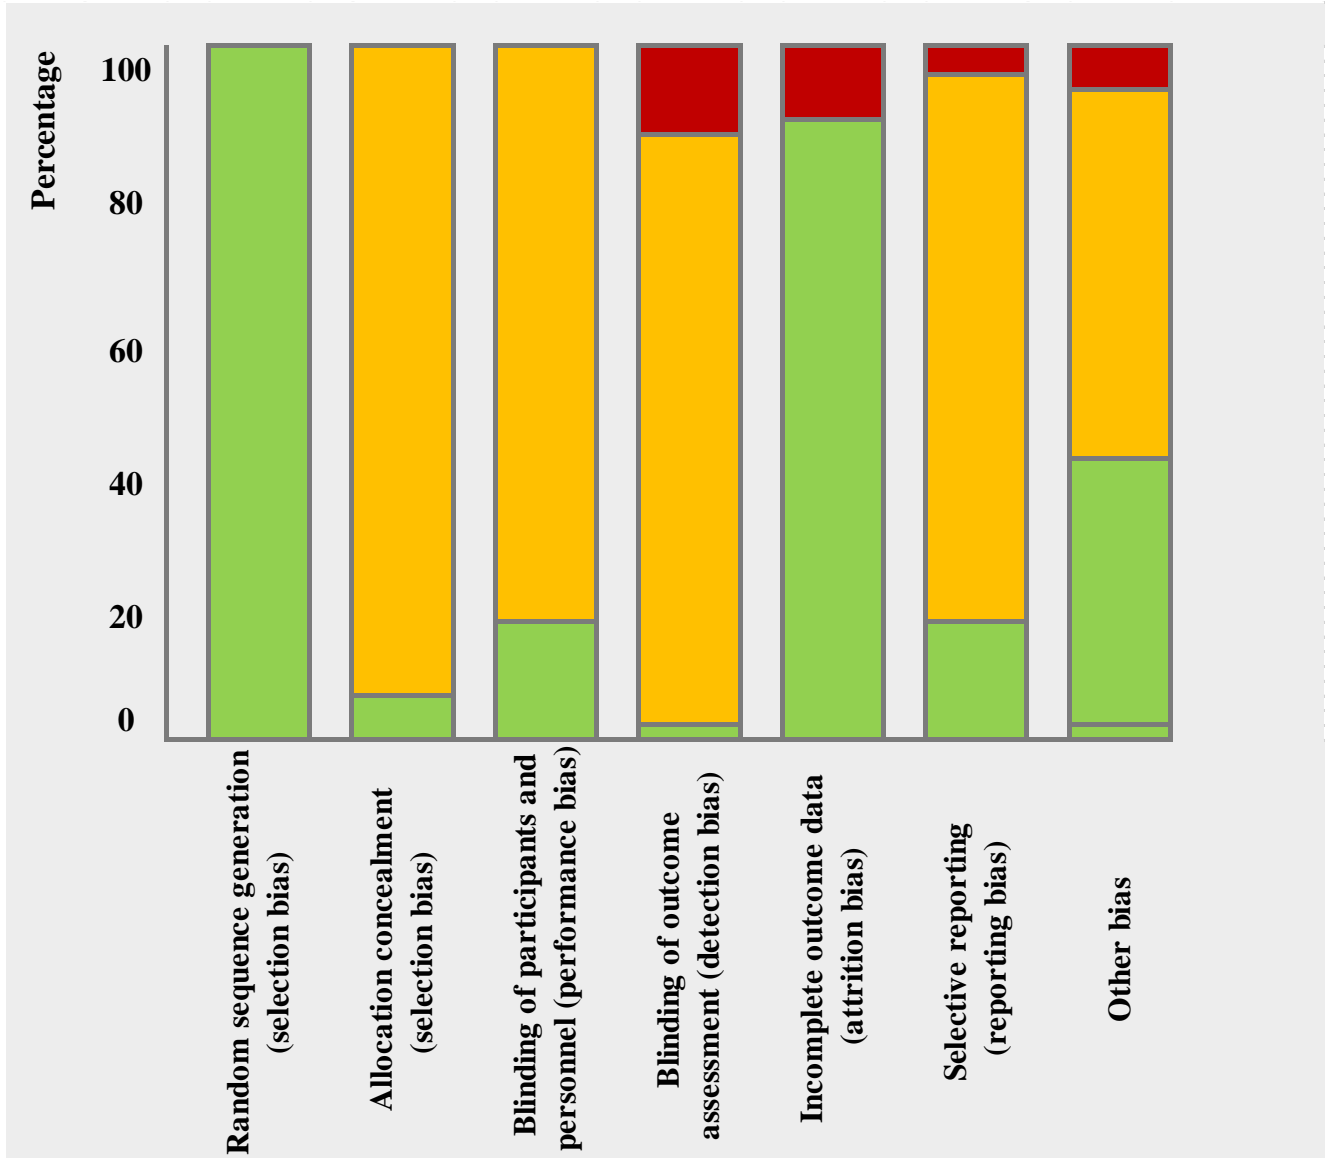

Supplement: f3 [file 6630598.f3.pdf]
